# Supplementary material for: What is it like to live with obesity in Peninsular Malaysia? A qualitative study
Source: PubMed Central journal article supplement — Clin Obes. 2022 May 29;12(5):e12538. doi: 10.1111/cob.12538 (PMC9541318; doi:10.1111/cob.12538), 2022-05-29
Supplement: COB-12-e12538-s001.pdf [file COB-12-e12538-s001.pdf]

## Appendix 1: semi-structured interview guide

*(English version)*

### Perception/ Lived experience

1. What does obesity mean to you?
  - Why do you think so?
2. Can you share with me your experience living with obesity?
  - Any experience with your family members, colleagues, in public spaces?
  - How do you feel about that experiences?
  - How to do you respond/react to that situation?
3. How does having high body weight affected your life? - in terms of physical, psychological (feeling and thought), spiritual, and social (relationship with other people), health
  - Please elaborate.
  - How do you react then? Please explain more.
4. Do you think you have to do something about your weight now?
  - Have you tried to lose weight? If yes, why and how? What or who encourage you to change?
  - If not, why?
5. *(Show imagery 1 - emoticon)*  
Please choose one emoticon that best describe your feeling about obesity.  
Can you explain why you choose that one?

### Environmental factors

6. What and who contributes to your obesity?
  - Is there any personal factor that contributes to your obesity?
  - Can you share how it occurred? Can you elaborate?
  - Do you think the environment and the people around you contribute to your obesity?
  - How? Can you explain more?
7. *(Show imagery 2 – healthy vs unhealthy Malaysian food)*  
Between these two pictures, which one do you usually take? Can you explain why?  
Which one do you prefer? Why?  
How do you decide which food you usually choose?
8. *(Show imagery 3 - various type and range of physical activities)*  
Among all these pictures, which one is related to you? Can you elaborate?  
If none is related – why? Can you elaborate?

*(Malay language version)*

#### Pandangan/Pengalaman hidup

1. Apakah maksud obesiti bagi anda?
  - Mengapa anda berfikir begitu?
2. Bolehkah anda berkongsi dengan saya pengalaman hidup anda dengan obesiti?
  - Adakah sebarang pengalaman melibatkan ahli keluarga, rakan sekerja, tempat awam?
  - Apakah perasaan anda tentang pengalaman itu?
  - Bagaimana anda bertindak balas terhadap keadaan itu?
3. Bagaimana berat badan yang tinggi mempengaruhi kehidupan anda? - dari segi fizikal, psikologi (perasaan dan pemikiran), kerohanian, dan sosial (hubungan dengan orang lain), kesihatan
  - boleh terangkan lebih lanjut.
  - Bagaimana reaksi anda? Tolong jelaskan lebih lanjut.
4. Adakah anda fikir anda perlu melakukan sesuatu mengenai berat badan anda sekarang?
  - Adakah anda pernah berusaha menurunkan berat badan? Sekiranya ya, mengapa dan bagaimana? Apa atau siapa yang mendorong anda untuk berubah?
  - Sekiranya tidak, mengapa?
5. *(Tunjukkan imej 1 - emoticon)*  
Pilih satu emoticon yang paling tepat menggambarkan perasaan anda mengenai obesiti. Bolehkah terangkan kenapa anda pilih emoticon ini?

#### Faktor persekitaran

6. Apakah dan siapakah yang menyumbang kepada keadaan obesiti anda?
  - Adakah mana-mana faktor peribadi yang menyebabkan obesiti?
  - Boleh anda berkongsi bagaimana ia berlaku? Boleh anda menghuraikan?
  - Adakah anda fikir faktor persekitaran dan orang sekeliling menyumbang kepada obesiti anda?
  - Bagaimana? Bolehkah anda menerangkan lebih lanjut?
7. *(Tunjukkan imej 2 - makanan Malaysia)*  
Di antara dua gambar ini, yang manakah anda biasa ambil? Boleh terangkan kenapa? Yang mana yang anda lebih suka? Kenapa?  
Biasanya, bagaimana anda tentukan makanan yang anda pilih?
8. *(Tunjukkan imej 3 - aktiviti fizikal)*  
Antara semua gambar ini, yang mana berkaitan dengan anda? Boleh anda jelaskan kenapa?  
Jika tiada – kenapa gambar-gambar ini tiada kaitan dengan anda? Boleh jelaskan?
